# Supplementary material for: Rapid Assessment of COVID-19 Mortality Risk with GASS Classifiers
Source: MDPI journal article supplement (doi:10.3390/biomedicines11030831), 2023-03-09
Supplement: s1 [file s1]

|                                              | <b>0</b> | <b>+1</b> | <b>+2</b> | <b>+3</b> | <b>+4</b> |
|----------------------------------------------|----------|-----------|-----------|-----------|-----------|
| <b>Age (years)</b>                           | <45      | 45-60     | 61-74     | 75-89     | ≥90       |
| <b>Sex</b>                                   | Female   | Male      |           |           |           |
| <b>RR (bpm)</b>                              | <20      | 20-30     | >30       |           |           |
| <b>PaO<sub>2</sub>/FiO<sub>2</sub> ratio</b> | >300     | 200-300   | 100-199   | <100      |           |
| <b>Lymphocytes count (n/mm<sup>3</sup>)</b>  | >1000    | 500-999   | <500      |           |           |
| <b>D-Dimer (mg/L FEU)</b>                    | <0.5     | 0.5-2.0   | >2.0      |           |           |
| <b>CKI</b>                                   | Moderate | Severe    |           |           |           |
| <b>eGFR (ml/min)</b>                         | >60      | 45-60     | 30-44     | <30       |           |
| <b>Troponin (ng/ml)</b>                      | <20      | 20-50     | >50       |           |           |
| <b>BNP (pg/ml)</b>                           | <100     | >100      |           |           |           |
| <b>CRP (mg/dl)</b>                           | 0-4.9    | 5.0-10.0  | >10.0     |           |           |

**Supplementary Table S1 - GASS score items** – RR= Respiratory Rate; bpm= breaths per minute; CKI= Chronic Kidney Injury; eGFR= estimated Glomerular Filtration Rate; BNP= Brain Natriuretic Peptide; CRP= C Reactive Protein.

|                                                     | <b>+1</b> | <b>+2</b> | <b>+3</b> | <b>+6</b> |
|-----------------------------------------------------|-----------|-----------|-----------|-----------|
| <b>Coronary Artery Disease</b>                      | *         |           |           |           |
| <b>Congestive Heart Failure</b>                     | *         |           |           |           |
| <b>Chronic Pulmonary Disease</b>                    | *         |           |           |           |
| <b>Peptic Ulcer Disease</b>                         | *         |           |           |           |
| <b>Peripheral Vascular Disease</b>                  | *         |           |           |           |
| <b>Mild Liver Disease</b>                           | *         |           |           |           |
| <b>Cerebrovascular Disease</b>                      | *         |           |           |           |
| <b>Connective Tissue Disease</b>                    | *         |           |           |           |
| <b>Diabetes</b>                                     | *         |           |           |           |
| <b>Dementia</b>                                     | *         |           |           |           |
| <b>Hemiplegia</b>                                   |           | *         |           |           |
| <b>Moderate-to-Severe Renal Disease</b>             |           | *         |           |           |
| <b>Diabetes with End-organ Damage</b>               |           | *         |           |           |
| <b>Any Prior Tumour (within 5 yrs of Diagnosis)</b> |           | *         |           |           |
| <b>Leukaemia</b>                                    |           | *         |           |           |
| <b>Lymphoma</b>                                     |           | *         |           |           |
| <b>Moderate-to-Severe Liver Disease</b>             |           |           | *         |           |
| <b>Metastatic Solid Tumour</b>                      |           |           |           | *         |
| <b>AIDS (not only HIV Positive)</b>                 |           |           |           | *         |

---

**Supplementary Table S2 - Charlson Comorbidity Index items – AIDS= Acquired ImmunoDeficiency Syndrome.**

| Variable                                         | IoCp (N=76) | NIoCp (N=174) | <i>p</i> |
|--------------------------------------------------|-------------|---------------|----------|
| Men                                              | 50 (65.8)   | 87 (50.0)     | 0.021    |
| Women                                            | 26 (34.2)   | 87 (50.0)     |          |
| Age <45                                          | 3 (3.9)     | 25 (14.4)     | 0.016    |
| Age 45-60                                        | 13 (17.1)   | 36 (20.7)     | 0.51     |
| Age 61-74                                        | 29 (38.2)   | 33 (19.0)     | 0.001    |
| Age 75-89                                        | 31 (40.8)   | 65 (37.4)     | 0.61     |
| Age ≥90                                          | 0 (0.0)     | 15 (8.6)      | 0.008    |
| RR <20 bpm                                       | 11 (14.5)   | 69 (39.7)     | <0.001   |
| RR 20-30 bpm                                     | 29 (38.2)   | 60 (34.5)     | 0.61     |
| RR >30 bpm                                       | 19 (25.0)   | 4 (2.3)       | <0.001   |
| PaO <sub>2</sub> /fiO <sub>2</sub> ratio >300    | 9 (11.8)    | 77 (44.3)     | <0.001   |
| PaO <sub>2</sub> /fiO <sub>2</sub> ratio 200-300 | 18 (23.7)   | 40 (23.0)     | 0.81     |
| PaO <sub>2</sub> /fiO <sub>2</sub> ratio 100-199 | 23 (30.3)   | 8 (4.6)       | <0.001   |
| PaO <sub>2</sub> /fiO <sub>2</sub> ratio <100    | 11(14.5)    | 3 (1.7)       | <0.001   |
| Lymphocytes >1000/mm <sup>3</sup>                | 32 (42.1)   | 91 (52.3)     | 0.11     |
| Lymphocytes 500-999/mm <sup>3</sup>              | 34 (44.7)   | 70 (40.2)     | 0.58     |
| Lymphocytes <500/mm <sup>3</sup>                 | 10 (13.2)   | 11 (6.3)      | 0.08     |
| CRP <5 mg/dl                                     | 31 (40.8)   | 88 (50.6)     | 0.16     |
| CRP 5-10 mg/dl                                   | 12 (15.8)   | 47 (27.0)     | 0.06     |
| CRP >10 mg/dl                                    | 32 (42.1)   | 37 (21.3)     | 0.001    |
| eGFR >60 ml/min                                  | 54 (71.1)   | 118 (67.8)    | 0.55     |
| eGFR 45-60 ml/min                                | 12 (15.8)   | 19 (10.9)     | 0.27     |
| eGFR 30-44 ml/min                                | 5 (6.6)     | 13 (7.5)      | 0.81     |
| eGFR <30 ml/min                                  | 4 (5.3)     | 23 (13.2)     | 0.06     |
| D-dimer <0.5 mg/L FEU                            | 8 (10.5)    | 48 (27.6)     | 0.002    |
| D-dimer 0.5-2 mg/L FEU                           | 47 (61.8)   | 78 (44.8)     | 0.035    |
| D-dimer >2 mg/L FEU                              | 21 (27.6)   | 39 (22.4)     | 0.51     |
| HS TnI <20 ng/ml                                 | 42 (55.3)   | 107 (61.5)    | 0.49     |
| HS TnI 20-50 ng/ml                               | 13 (17.1)   | 29 (16.7)     | 0.85     |
| HS TnI >50 ng/ml                                 | 14 (18.4)   | 27 (15.5)     | 0.50     |
| BNP <100 pg/ml                                   | 41 (53.9)   | 95 (54.6)     | 0.94     |
| BNP ≥100 pg/ml                                   | 27 (35.5)   | 64 (36.8)     | 0.94     |
| Clinical GASS <5 pts                             | 4 (5.3)     | 49 (28.2)     | <0.001   |
| Clinical GASS 5-10 pts                           | 42 (55.3)   | 88 (50.6)     | 0.50     |
| Clinical GASS >10 pts                            | 30 (39.5)   | 37 (21.3)     | 0.003    |

**Supplementary Table S3 - GASS score items – differences between groups in terms of Intensification of Care.** IoCp = patients who needed Intensification of Care; NIoCp = patients who did not need Intensification of Care; RR = Respiratory Rate; CRP = C Reactive Protein; eGFR = estimated Glomerular Filtration Rate; HS TnI = High Sensitivity Troponin I; BNP = Brain Natriuretic Peptide; GASS = General Assessment of SARS-CoV-2 Severity.

| Variable                                         | Deceased<br>(N=62) | Discharged<br>(N=188) | <i>p</i> |
|--------------------------------------------------|--------------------|-----------------------|----------|
| Men                                              | 31 (50.0)          | 106 (56.4)            | 0.38     |
| Women                                            | 31 (50.0)          | 82 (43.6)             |          |
| Age <45                                          | 0 (0.0)            | 28 (14.9)             | 0.001    |
| Age 45-60                                        | 3 (4.8)            | 46 (24.5)             | 0.001    |
| Age 61-74                                        | 9 (14.5)           | 53 (28.2)             | 0.031    |
| Age 75-89                                        | 44 (71.0)          | 52 (27.7)             | <0.001   |
| Age ≥90                                          | 6 (9.7)            | 9 (4.8)               | 0.16     |
| RR <20 bpm                                       | 14 (22.6)          | 66 (35.1)             | 0.06     |
| RR 20-30 bpm                                     | 24 (38.7)          | 65 (34.6)             | 0.46     |
| RR >30 bpm                                       | 9 (14.5)           | 14 (7.4)              | 0.08     |
| PaO <sub>2</sub> /fiO <sub>2</sub> ratio >300    | 10 (16.1)          | 76 (40.4)             | 0.001    |
| PaO <sub>2</sub> /fiO <sub>2</sub> ratio 200-300 | 17 (27.4)          | 41 (21.8)             | 0.12     |
| PaO <sub>2</sub> /fiO <sub>2</sub> ratio 100-199 | 11 (17.7)          | 20 (10.6)             | 0.052    |
| PaO <sub>2</sub> /fiO <sub>2</sub> ratio <100    | 4 (6.5)            | 10 (5.3)              | 0.55     |
| Lymphocytes >1000/mm <sup>3</sup>                | 19 (30.6)          | 104 (55.3)            | 0.001    |
| Lymphocytes 500-999/mm <sup>3</sup>              | 33 (53.2)          | 71 (37.8)             | 0.029    |
| Lymphocytes <500/mm <sup>3</sup>                 | 9 (14.5)           | 12 (6.4)              | 0.044    |
| CRP <5 mg/dl                                     | 21 (33.9)          | 98 (52.1)             | 0.013    |
| CRP 5-10 mg/dl                                   | 16 (25.8)          | 43 (22.9)             | 0.62     |
| CRP >10 mg/dl                                    | 24 (38.7)          | 45 (23.9)             | 0.022    |
| eGFR >60 ml/min                                  | 28 (45.2)          | 144 (76.6)            | <0.001   |
| eGFR 45-60 ml/min                                | 11 (17.7)          | 20 (10.6)             | 0.13     |
| eGFR 30-44 ml/min                                | 7 (11.3)           | 11 (5.9)              | 0.14     |
| eGFR <30 ml/min                                  | 15 (24.2)          | 12 (6.4)              | <0.001   |
| D-dimer <0.5 mg/L FEU                            | 4 (6.5)            | 52 (27.7)             | 0.001    |
| D-dimer 0.5-2 mg/L FEU                           | 35 (56.5)          | 90 (47.9)             | 0.19     |
| D-dimer >2 mg/L FEU                              | 20 (32.3)          | 40 (21.3)             | 0.07     |
| HS TnI <20 ng/ml                                 | 21 (33.9)          | 128 (68.1)            | <0.001   |
| HS TnI 20-50 ng/ml                               | 16 (25.8)          | 26 (13.8)             | 0.030    |
| HS TnI >50 ng/ml                                 | 21 (33.9)          | 20 (10.6)             | <0.001   |
| BNP <100 pg/ml                                   | 17 (27.4)          | 119 (63.3)            | <0.001   |
| BNP ≥100 pg/ml                                   | 42 (67.7)          | 49 (26.1)             | <0.001   |
| GASS <5 pts                                      | 2 (3.2)            | 51 (27.1)             | 0.53     |
| GASS 5-10 pts                                    | 27 (43.5)          | 103 (54.8)            | 0.65     |
| GASS >10 pts                                     | 33 (53.2)          | 34 (18.1)             | 0.82     |

**Supplementary Table S4 - GASS score items – differences between groups in terms of in-hospital mortality.** RR = Respiratory Rate; CRP = C Reactive Protein; eGFR = estimated Glomerular Filtration Rate; HS TnI = High Sensitivity Troponin I; BNP = Brain Natriuretic Peptide; GASS = General Assessment of SARS-CoV-2 Severity.

| Variable                                         | 30-ddp (N=59) | 30-dsp (N=191) | <i>p</i> |
|--------------------------------------------------|---------------|----------------|----------|
| Men                                              | 28 (47.5)     | 109 (57.1)     | 0.20     |
| Women                                            | 31 (52.5)     | 82 (42.9)      |          |
| Age <45                                          | 0 (0.0)       | 28 (14.7)      | 0.002    |
| Age 45-60                                        | 3 (5.1)       | 46 (24.1)      | 0.001    |
| Age 61-74                                        | 13 (22.0)     | 49 (25.7)      | 0.45     |
| Age 75-89                                        | 37 (62.7)     | 59 (30.9)      | <0.001   |
| Age ≥90                                          | 6 (10.2)      | 9 (4.7)        | 0.12     |
| RR <20 bpm                                       | 16 (27.1)     | 64 (33.5)      | 0.42     |
| RR 20-30 bpm                                     | 20 (33.9)     | 69 (36.1)      | 0.89     |
| RR >30 bpm                                       | 8 (13.6)      | 15 (7.9)       | 0.15     |
| PaO <sub>2</sub> /fiO <sub>2</sub> ratio >300    | 11 (18.6)     | 75 (39.3)      | 0.007    |
| PaO <sub>2</sub> /fiO <sub>2</sub> ratio 200-300 | 15 (25.4)     | 43 (22.5)      | 0.36     |
| PaO <sub>2</sub> /fiO <sub>2</sub> ratio 100-199 | 10 (16.9)     | 21 (11.0)      | 0.12     |
| PaO <sub>2</sub> /fiO <sub>2</sub> ratio <100    | 5 (8.5)       | 9 (4.7)        | 0.19     |
| Lymphocytes >1000/mm <sup>3</sup>                | 21 (35.6)     | 102 (53.4)     | 0.018    |
| Lymphocytes 500-999/mm <sup>3</sup>              | 29 (49.2)     | 75 (39.3)      | 0.16     |
| Lymphocytes <500/mm <sup>3</sup>                 | 8 (13.6)      | 13 (6.8)       | 0.10     |
| CRP <5 mg/dl                                     | 21 (35.6)     | 98 (51.3)      | 0.037    |
| CRP 5-10 mg/dl                                   | 15 (25.4)     | 44 (23.0)      | 0.69     |
| CRP >10 mg/dl                                    | 22 (37.3)     | 47 (24.6)      | 0.052    |
| eGFR >60 ml/min                                  | 27 (45.8)     | 145 (75.9)     | <0.001   |
| eGFR 45-60 ml/min                                | 12 (20.3)     | 19 (9.9)       | 0.031    |
| eGFR 30-44 ml/min                                | 5 (8.5)       | 13 (6.8)       | 0.65     |
| eGFR <30 ml/min                                  | 14 (23.7)     | 13 (6.8)       | <0.001   |
| D-dimer <0.5 mg/L FEU                            | 4 (6.8)       | 52 (27.2)      | 0.001    |
| D-dimer 0.5-2 mg/L FEU                           | 38 (64.4)     | 87 (45.5)      | 0.010    |
| D-dimer >2 mg/L FEU                              | 15 (25.4)     | 45 (23.6)      | 0.78     |
| HS TnI <20 ng/ml                                 | 18 (30.5)     | 131 (68.6)     | <0.001   |
| HS TnI 20-50 ng/ml                               | 16 (27.1)     | 26 (13.6)      | 0.015    |
| HS TnI >50 ng/ml                                 | 21 (35.6)     | 20 (10.5)      | <0.001   |
| BNP <100 pg/ml                                   | 17 (28.8)     | 119 (62.3)     | <0.001   |
| BNP ≥100 pg/ml                                   | 39 (66.1)     | 52 (27.2)      | <0.001   |
| GASS <5 pts                                      | 2 (3.4)       | 51 (26.7)      | <0.001   |
| GASS 5-10 pts                                    | 26 (44.1)     | 104 (54.5)     | 0.16     |
| GASS >10 pts                                     | 31 (52.5)     | 36 (18.8)      | <0.001   |

**Supplementary Table S5 - GASS score items – differences between groups in terms of 30-day mortality.** 30-ddp = patients deceased within 30 days; 30-dsp = patients survived after 30 days; RR = Respiratory Rate; CRP = C Reactive Protein; eGFR = estimated Glomerular Filtration Rate; HS TnI = High Sensitivity Troponin I; BNP = Brain Natriuretic Peptide; GASS = General Assessment of SARS-CoV-2 Severity.
